# Supplementary material for: Habitat use of bats in relation to wind turbines revealed by GPS tracking
Source: PubMed Central journal article supplement (PMC4931514; doi:10.1038/srep28961), 2016-07-04
Supplement: srep28961-s1.pdf [file srep28961-s1.pdf]

## Habitat use of bats in relation to wind turbines revealed by GPS tracking

Roeleke Manuel<sup>1</sup>, Blohm Torsten<sup>2</sup>, Kramer-Schadt Stephanie<sup>1</sup>, Yovel Yossi<sup>3</sup>, Voigt C. Christian<sup>1</sup>

<sup>1</sup>Department of Evolutionary Ecology, Leibniz Institute for Zoo and Wildlife Research, Berlin 10315, Germany

<sup>2</sup> Dorfstraße 48, Prenzlau 17291, Germany

<sup>3</sup> Department of Zoology, Faculty of Life Sciences, Tel Aviv University, Tel Aviv 6997801, Israel

Email addresses

Torsten Blohm: [torsten-blohm@t-online.de](mailto:torsten-blohm@t-online.de)

Stephanie Kramer-Schadt: [kramer@izw-berlin.de](mailto:kramer@izw-berlin.de)

Yossi Yovel: [yossiy@post.tau.ac.il](mailto:yossiy@post.tau.ac.il)

Christian C. Voigt: [voigt@izw-berlin.de](mailto:voigt@izw-berlin.de)

Corresponding author: Manuel Roeleke

[roeleke@izw-berlin.de](mailto:roeleke@izw-berlin.de)

Phone: ++ 49-30-5168-423

Fax: ++ 49-30-5126-104

## Supplementary Material

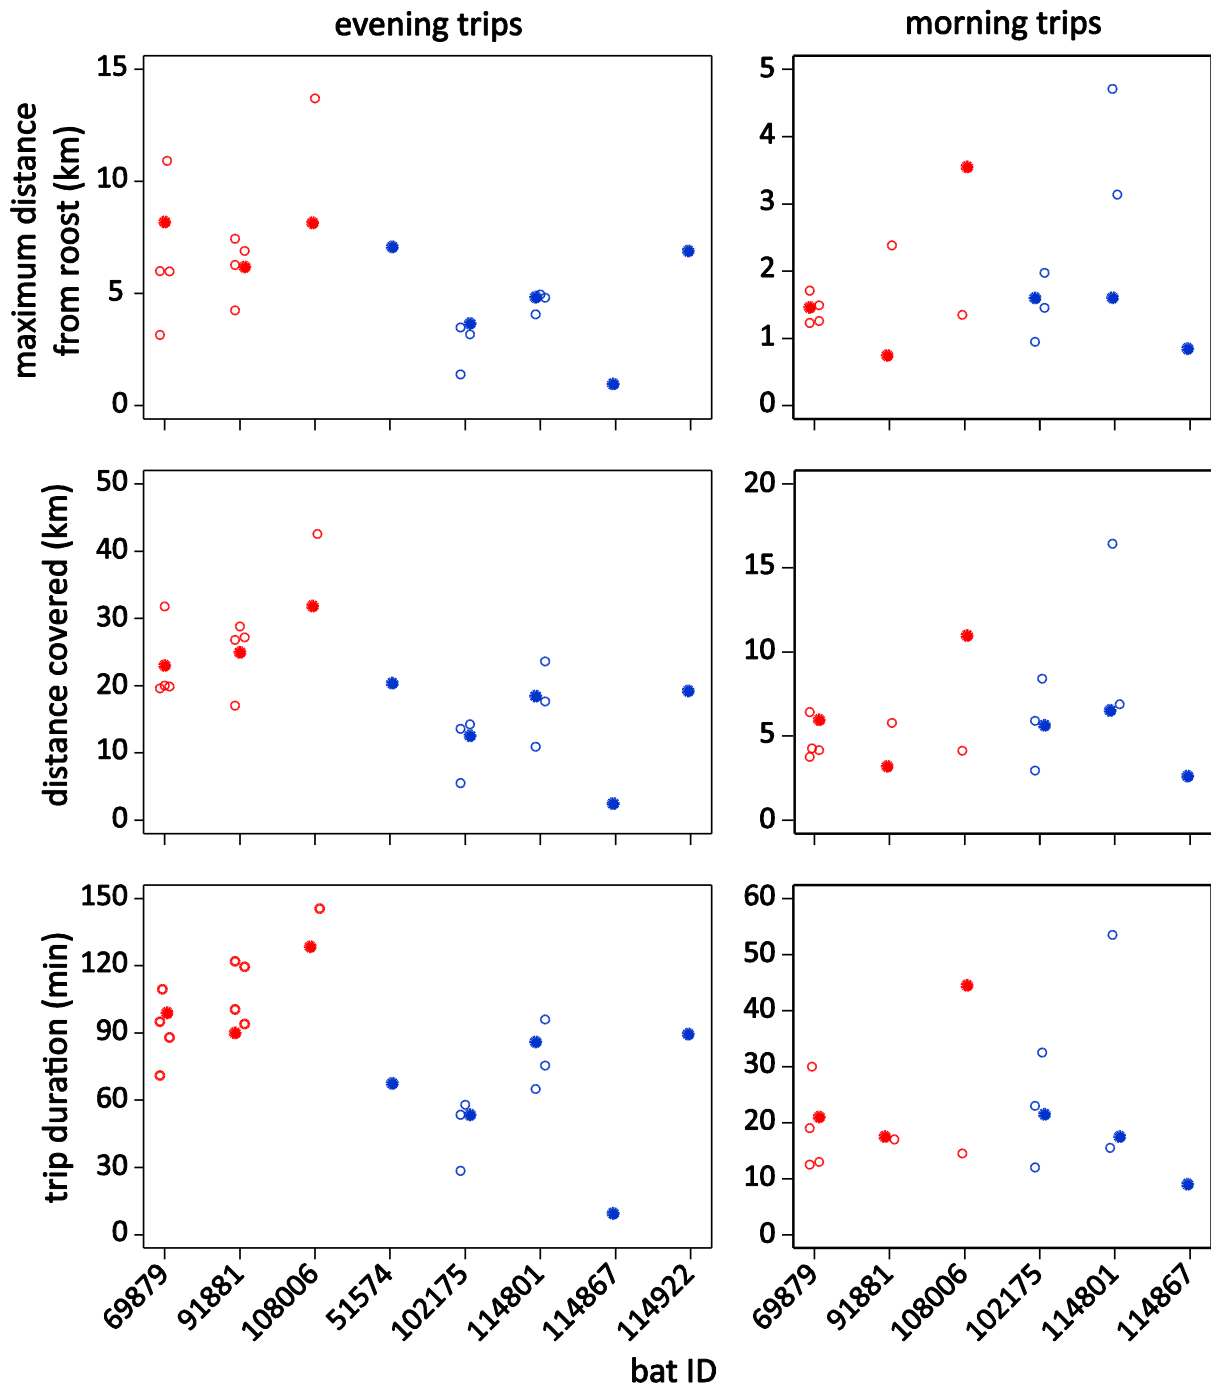

**Supplementary Material Figure S1: Maximum distance from the roost, total distance covered, and duration of the respective trips (from top to bottom) for all 40 bat trajectories.** The left column summarizes the data for evening trips, the right column for morning trips. Data of females is represented by red circles, data of males by blue circles. For every individual and daytime (i.e. evening or morning), one trip was randomly chosen for statistical analysis. These data points are represented by large, filled circles.

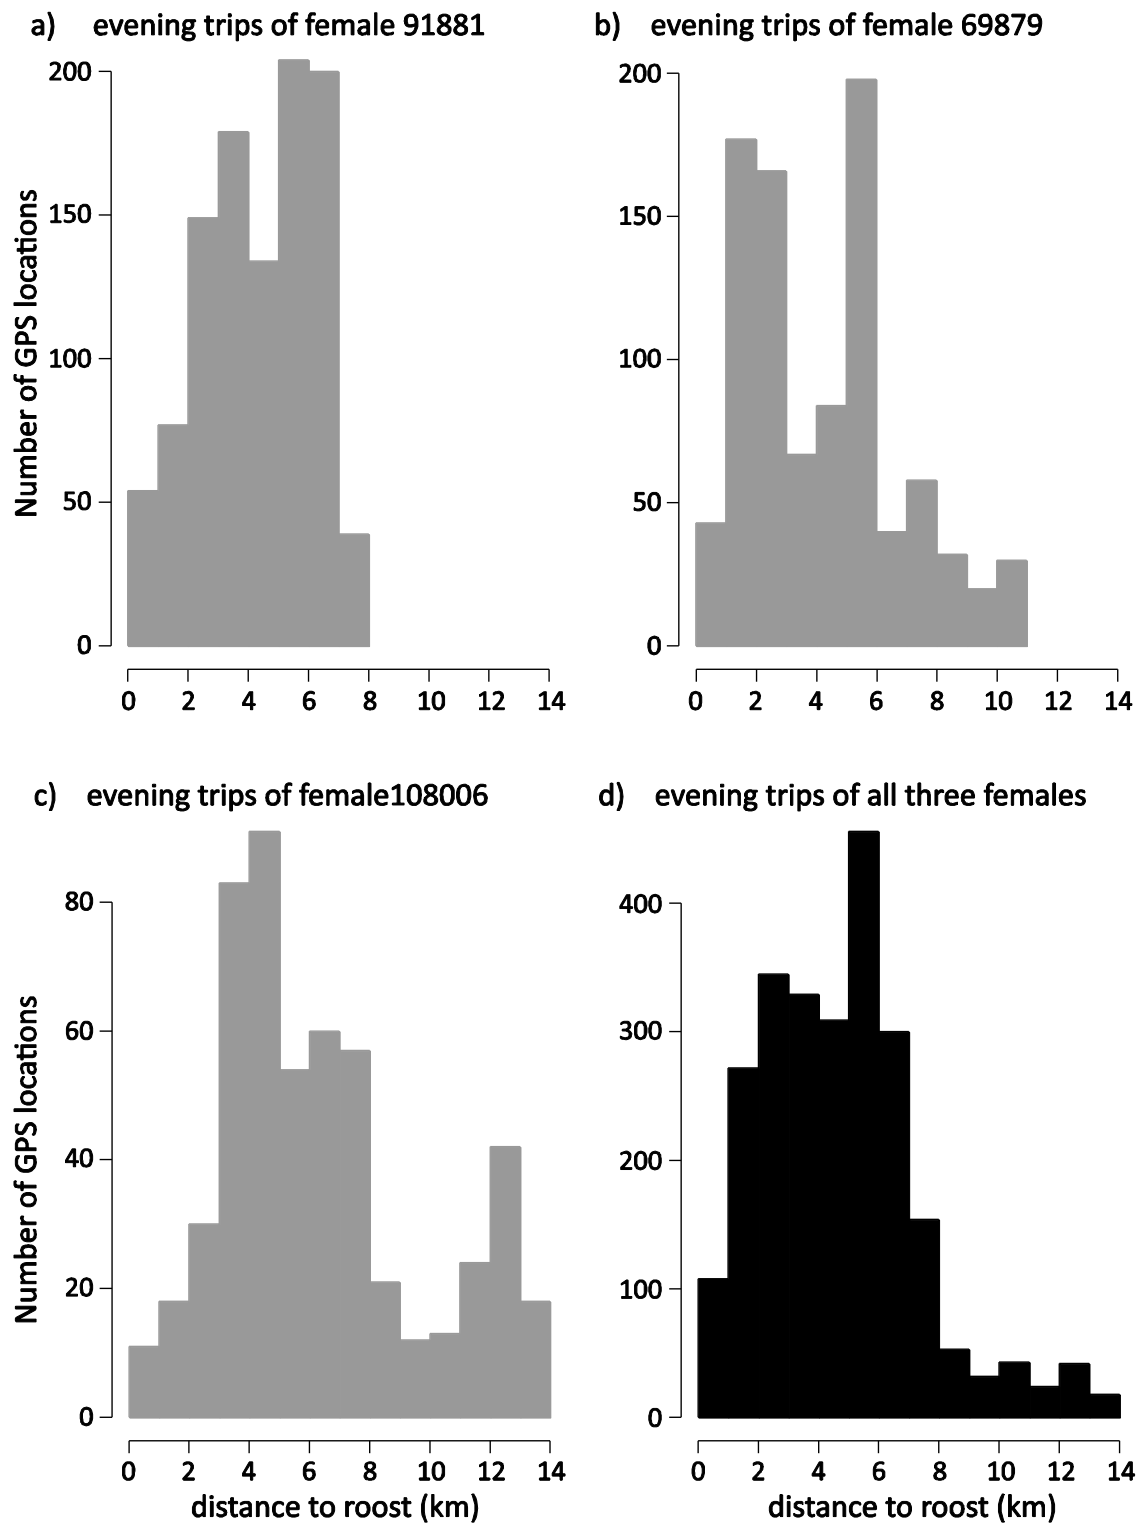

**Supplementary Material Figure S2: Distance of GPS locations to the roost, pooled for all evening trips of the respective females (a-c), and for all evening trips off all three females together (d).**

Supplementary Material Table S1: Summary of the bat presence model

Generalized linear mixed model fit by maximum likelihood (Laplace Approximation) ['glmerMod']

Family: binomial ( logit )

Formular = bat\_presence ~ (habitat + dist\_wind\_turbine + dist\_linear\_structure) \* sex +  
+ (1 | bat\_ID/bat\_trip)

|         |         |          |          |          |
|---------|---------|----------|----------|----------|
| AIC     | BIC     | logLik   | deviance | df.resid |
| 53999.3 | 54163.1 | -26979.6 | 53959.3  | 26554    |

Scaled residuals:

|         |         |         |         |         |
|---------|---------|---------|---------|---------|
| Min     | 1Q      | Median  | 3Q      | Max     |
| -4.9469 | -0.9796 | -0.7583 | -0.4902 | 12.0999 |

Random effects:

|                 |             |          |          |
|-----------------|-------------|----------|----------|
| Groups          | Name        | Variance | Std.Dev. |
| bat_trip:bat_ID | (Intercept) | 0.1017   | 0.3188   |
| bat_ID          | (Intercept) | 0        | 0        |

26574 observations

40 groups: bat\_trip:bat\_ID

| Fixed effect                            | Estimate | Std. Error | z value | P value  | significance |
|-----------------------------------------|----------|------------|---------|----------|--------------|
| conventional cropland                   | 0.71352  | 0.10695    | 6.672   | 2.53E-11 | ***          |
| forest                                  | -0.07096 | 0.12183    | -0.582  | 0.56029  |              |
| grasslands                              | 1.58816  | 0.10945    | 14.511  | 2.00E-16 | ***          |
| organic cropland                        | 1.67785  | 0.10432    | 16.084  | 2.00E-16 | ***          |
| bushes & hedges                         | 0.6845   | 0.14433    | 4.742   | 2.11E-06 | ***          |
| urban                                   | 1.37295  | 0.13726    | 10.003  | 2.00E-16 | ***          |
| water                                   | 1.99024  | 0.12638    | 15.747  | 2.00E-16 | ***          |
| distance to wind turbine                | -0.69613 | 0.07711    | -9.027  | 2.00E-16 | ***          |
| distance to linear structure            | -2.76779 | 0.12623    | -21.926 | 2.00E-16 | ***          |
| sex=male                                | -3.09939 | 0.19772    | -15.676 | 2.00E-16 | ***          |
| forest : sex=male                       | 1.6025   | 0.08618    | 18.595  | 2.00E-16 | ***          |
| grasslands : sex=male                   | 1.59955  | 0.08801    | 18.174  | 2.00E-16 | ***          |
| organic cropland : sex=male             | 1.23357  | 0.07124    | 17.315  | 2.00E-16 | ***          |
| bushes & hedges : sex=male              | 1.63318  | 0.15807    | 10.332  | 2.00E-16 | ***          |
| urban : sex=male                        | 1.83522  | 0.16593    | 11.06   | 2.00E-16 | ***          |
| water : sex=male                        | 2.08202  | 0.11682    | 17.822  | 2.00E-16 | ***          |
| distance to wind turbine : sex=male     | 2.3991   | 0.16049    | 14.948  | 2.00E-16 | ***          |
| distance to linear structure : sex=male | -0.67354 | 0.24149    | -2.789  | 0.00528  | **           |

Significance codes: < 0.001 '\*\*\*' 0.001 '\*\*' 0.01 '\*'

**Supplementary Material Table S2: AICc values used for model selection.** The full model explaining bat presence by distance to linear structures, distance to wind turbines, habitat type, and interactions of these variables was the best model and thus was used in this study.

Global model call: `glmer(formular = bat_presence ~ (habitat + dist_wind_turbine + dist_linear_structure) * sex + (1 | bat_ID/bat_trip), data = bat_CRW, famiℳ = "binomial")`

---

Model selection table

| dist_linear_ structure | dist_wind_ turbine | habitat | sex | dist_linear_str: sex | dist_wt: sex | habitat:sex | df | logLik    | AICc    | delta AICc | weight |
|------------------------|--------------------|---------|-----|----------------------|--------------|-------------|----|-----------|---------|------------|--------|
| -2.768                 | -0.6961            | +       | +   | +                    | +            | +           | 20 | -26979.65 | 53999.3 | 0          | 0.948  |
| -2.954                 | -0.7072            | +       | +   | NO                   | +            | +           | 19 | -26983.56 | 54005.1 | 5.81       | 0.052  |
| -2.682                 | -0.1288            | +       | +   | +                    | NO           | +           | 19 | -27095.51 | 54229.1 | 229.73     | 0      |
| -2.663                 | NO                 | +       | +   | +                    | NO           | +           | 18 | -27097.43 | 54230.9 | 231.56     | 0      |
| -3.021                 | -0.1183            | +       | +   | NO                   | NO           | +           | 18 | -27108.63 | 54253.3 | 253.95     | 0      |
| -2.999                 | NO                 | +       | +   | NO                   | NO           | +           | 17 | -27110.24 | 54254.5 | 255.18     | 0      |
| NO                     | -0.5528            | +       | +   | NO                   | +            | +           | 18 | -27377.63 | 54791.3 | 791.95     | 0      |
| -2.427                 | -0.566             | +       | +   | +                    | +            | NO          | 14 | -27469.78 | 54967.6 | 968.24     | 0      |
| -3.084                 | -0.5867            | +       | +   | NO                   | +            | NO          | 13 | -27512.72 | 55051.4 | 1052.11    | 0      |
| NO                     | NO                 | +       | +   | NO                   | NO           | +           | 16 | -27523.39 | 55078.8 | 1079.46    | 0      |
| NO                     | 0.0769             | +       | +   | NO                   | NO           | +           | 17 | -27522.69 | 55079.4 | 1080.08    | 0      |
| -2.369                 | -0.1298            | +       | +   | +                    | NO           | NO          | 13 | -27537.56 | 55101.1 | 1101.8     | 0      |
| -2.35                  | NO                 | +       | +   | +                    | NO           | NO          | 12 | -27539.51 | 55103   | 1103.71    | 0      |
| -3.092                 | -0.1108            | +       | NO  | NO                   | NO           | NO          | 11 | -27592.29 | 55206.6 | 1207.26    | 0      |
| -3.091                 | -0.1104            | +       | +   | NO                   | NO           | NO          | 12 | -27591.37 | 55206.7 | 1207.41    | 0      |
| -3.072                 | NO                 | +       | NO  | NO                   | NO           | NO          | 10 | -27593.72 | 55207.4 | 1208.11    | 0      |
| -3.071                 | NO                 | +       | +   | NO                   | NO           | NO          | 11 | -27592.78 | 55207.6 | 1208.24    | 0      |
| NO                     | -0.3897            | +       | +   | NO                   | +            | NO          | 12 | -27958.37 | 55940.8 | 1941.42    | 0      |
| NO                     | 0.09852            | +       | +   | NO                   | NO           | NO          | 11 | -28040.35 | 56102.7 | 2103.39    | 0      |
| NO                     | NO                 | +       | +   | NO                   | NO           | NO          | 10 | -28041.49 | 56103   | 2103.66    | 0      |
| NO                     | 0.09807            | +       | NO  | NO                   | NO           | NO          | 10 | -28041.56 | 56103.1 | 2103.79    | 0      |
| NO                     | NO                 | +       | NO  | NO                   | NO           | NO          | 9  | -28042.69 | 56103.4 | 2104.05    | 0      |
| -3.276                 | -1.347             | NO      | +   | +                    | +            | NO          | 8  | -29376.41 | 58768.8 | 4769.5     | 0      |
| -3.204                 | -0.8954            | NO      | +   | +                    | NO           | NO          | 7  | -29448.06 | 58910.1 | 4910.79    | 0      |
| -4.379                 | -1.421             | NO      | +   | NO                   | +            | NO          | 7  | -29496.05 | 59006.1 | 5006.77    | 0      |
| -3.065                 | NO                 | NO      | +   | +                    | NO           | NO          | 6  | -29558.97 | 59130   | 5130.62    | 0      |
| -4.365                 | -0.8976            | NO      | +   | NO                   | NO           | NO          | 6  | -29585.73 | 59183.5 | 5184.13    | 0      |
| -4.37                  | -0.8844            | NO      | NO  | NO                   | NO           | NO          | 4  | -29610.74 | 59229.5 | 5230.14    | 0      |
| -4.218                 | NO                 | NO      | +   | NO                   | NO           | NO          | 5  | -29697.53 | 59405.1 | 5405.73    | 0      |
| -4.224                 | NO                 | NO      | NO  | NO                   | NO           | NO          | 3  | -29715.65 | 59437.3 | 5437.98    | 0      |
| NO                     | -1.112             | NO      | +   | NO                   | +            | NO          | 6  | -30555.56 | 61123.1 | 7123.79    | 0      |
| NO                     | -0.6315            | NO      | +   | NO                   | NO           | NO          | 5  | -30635.76 | 61281.5 | 7282.2     | 0      |
| NO                     | -0.6061            | NO      | NO  | NO                   | NO           | NO          | 3  | -30660.77 | 61327.5 | 7328.21    | 0      |
| NO                     | NO                 | NO      | NO  | NO                   | NO           | NO          | 3  | -30699.49 | 61405   | 7405.65    | 0      |
| NO                     | NO                 | NO      | +   | NO                   | NO           | NO          | 4  | -30699.49 | 61407   | 7407.65    | 0      |
